# Supplementary material
Source: PubMed Central journal article supplement (PMC2745846)
Supplement: blood-2009-03-212191_1.pdf [file blood-2009-03-212191_1.pdf]

| ID | Age/<br>Sex | DIAG  | Karyotype                                                                                                                                                                                                                                    | FISH             | BCL2<br>protein | OS<br>(years) |
|----|-------------|-------|----------------------------------------------------------------------------------------------------------------------------------------------------------------------------------------------------------------------------------------------|------------------|-----------------|---------------|
| 1  | 46<br>F     | DLBCL | 48,XX,dup(1)(?q15q21),+7,t(8;9)(q24;p13),+der(8)t(8;9),t(12;17)(q22;q24),t(14;18)(q32;q21)[5]*                                                                                                                                               | MYC+<br>BCL2: na | POS             | 10.4          |
| 2  | 58<br>M     | DLBCL | Nuc ish(MYCx2)(5'MYC sep 3'MYC x1),(IGHx3,BCL2 x4, IGH con BCL2 x3),(IGKx2),(IGLx2)<br>[156/200]- t(8;9)(q24;?),t(14;18)(q32;q21),+der(18)t(14;18)(q32;q21)                                                                                  | MYC+<br>BCL2+    | NEG             | 7.02          |
| 3  | 35<br>M     | DLBCL | 49,XY,i(1)(q10),del(4)(p15),i(6)(p10),+7,+der(8)t(8;14)(q24;q32)t(14;18)(q32;q21),<br>der(14)t(8;14),der(18)t(14;18),+der(18)t(1;18)(p13;p11)t(14;18)[10]*                                                                                   | MYC+<br>BCL2+    | NEG             | 6.30          |
| 4  | 49<br>M     | DLBCL | 60-61,XXY,der(1)t(1;8)(p?32:q22)t(8;9)(q24;p13),-4,-6,del(6)(?q21q25),t(8;9)(q24;p13),-10,<br>der(12)t(6;12)(p11;p13),-13,+der(14)t(14;18)(q32;q21),-15,-16,-20,-22[10]*                                                                     | MYC+<br>BCL2+    | NEG             | 5.66          |
| 5  | 73<br>M     | DLBCL | Nuc ish(MYCx2)(5'MYC sep 3'MYC x1),(IGHx3,BCL2 x3, IGH con BCL2 x2),(IGKx2),(IGLx2)<br>[198/200]- t(8;9)(q24;?),t(14;18)(q32;q21)                                                                                                            | MYC+<br>BCL2+    | POS             | 4.84          |
| 6  | 57<br>M     | BCLU  | 46,XY,der(3)t(3;8)(q27;q24),del(6)(q11),add(9)(p1),dup(12)(q13q15),del(13)(q?22q32),<br>der(14)t(14;18)(q32;q21)t(6;18)(q11;q23),del(16)(q2),del(17)(p13),der(18)t(14;18)[6]*                                                                | MYC+<br>BCL2+    | POS             | 4.37          |
| 7  | 56<br>M     | DLBCL | 47,XY,der(4)t(4;13)(p14;q14),t(8;9)(q24;p13),+12,der(14)t(14;18)(q32;q21),<br>der(18;21)(q10;p10)der(18)t(14;18),+21[15]*                                                                                                                    | MYC+<br>BCL2+    | POS             | 3.72          |
| 8  | 85<br>M     | DLBCL | Nuc ish(MYCx2)(5'MYC sep 3'MYC x1),(IGHx3,BCL2 x3, IGH con BCL2 x2),(IGKx2),(IGLx2)<br>[180/200]- t(8;9)(q24;?),t(14;18)(q32;q21)                                                                                                            | MYC+<br>BCL2+    | POS             | 3.32          |
| 9  | 42<br>F     | DLBCL | 76-80,XX,+r(X)(p?q?),-1,del(2)(p?1q?1),del(3)(p21),del(6)(q12),+7,+r(7)(p?q?),<br>+der(7)t(1;7)(?p13;?p22)t(7;16)(q?;?q11),t(8;9)(q24;p13)x3,+10,+11,+der(12)t(2;12)(?;q24),<br>t(14;18)(q32;q21)x2,-15,-6x2,+der(18)t(14;18),+20x2,+21[10]* | MYC+<br>BCL2+    | POS             | 3.05          |
| 10 | 54<br>M     | DLBCL | 47,XY,del(1)(p22),+del(1)(q25),del(3)(p21),add(4)(p14),t(5;8)(q31;q24),-8,-9,-9,<br>t(14;18)(q32;q21),-16,+18,-20,+r,+3-5mar[cp6]                                                                                                            | MYC+<br>BCL2: na | NA              | 2.86          |
| 11 | 30<br>F     | FL    | 46,XX,t(14;18)(q32;q21),der(19)t(X;19)(?q;?)[10]/<br>46,XX,der(8)t(8;14)(q24;q32)t(14;18)(q32;q21),der(14)t(8;14),der(18)t(14;18)[10]                                                                                                        | MYC+<br>BCL2+    | NA              | 1.95          |
| 12 | 65<br>F     | DLBCL | 65-71,XX,-X,der(1)t(1;3)(p36;q27)x2,der(1)(1;8)(q41;q22),-2,der(3)t(3;8)(?p25;q24)x2,<br>+7,der(8)del(8)(p21)del(8)(q23)x2,ider(8)(q10)t(3;8)(p21;q23),-9,+11,+12,+13,t(14;18)(q32;q21),<br>del(17)(p11),der(22)t(2;22)(?;q13)x2[9]*         | MYC+<br>BCL2: na | NA              | 1.76          |
| 13 | 67<br>F     | DLBCL | 53,XX,+X,+2,t(6;13)(q24;q12),+7,der(8)t(8;8)(p?21;q24),t(8;9)(q24;p13),+10,+12,<br>-15,+der(16)t(14;16)(q32;p13.3),+18,+21[20]                                                                                                               | MYC+**<br>BCL2+  | POS             | 1.40          |
| 14 | 62<br>M     | BCLU  | 46-47,XY,-1,del(1)(p34p36),+7,t(8;14)(q24;q32),del(10)(q22q24),t(14;18)(q32;q21),-16,<br>-18,+r,+mar[cp5].                                                                                                                                   | MYC+<br>BCL2: na | NA              | 1.35          |
| 15 | 44<br>F     | DLBCL | 48,XX,t(3;8)(q27;q24),del(6)(q11),t(6;19)(p21;q13.5),+7,+8,del(13)(q14q22),<br>t(14;18)(q32;q21),der(22)t(21;22)(p11;q11)*                                                                                                                   | MYC+<br>BCL2+    | NEG             | 1.17          |

| ID | Age/<br>Sex | DIAG  | Karyotype                                                                                                                                                                                                     | FISH                | BCL2<br>protein | OS<br>(years) |
|----|-------------|-------|---------------------------------------------------------------------------------------------------------------------------------------------------------------------------------------------------------------|---------------------|-----------------|---------------|
| 16 | 43<br>F     | BCLU  | 46,XX,der(1)t(1;8)(p36;q22),del(3)(p13p22), <u>der(8)t(8;14)(q24;q32)t(14;18)(q32;q21)</u> ,del(13)(q12q22),t(14;18)[8]*                                                                                      | MYC+<br>BCL2+       | NA              | 0.97          |
| 17 | 62<br>M     | BCLU  | 45,X,-Y,der(1)t(1;17)(p36;p11),der(1)invdup(1)(q11q32),del(2)(?q13q23), <u>t(8;14)(q24;q32)</u> ,add(9)(p?13),dup(12)(q14q24),del(13)(q?13q?33),t(14;18)(q32;q21),add(15)(q26)[7]*                            | MYC+<br>BCL2+       | POS             | 0.62          |
| 18 | 54<br>F     | DLBCL | 49-51,XX,der(1)t(1;6)(p36;?),add(3)(q27),+7,+8, <u>der(8)t(8;14)(q24;q32)</u> , -13,t(14;18)(q32;q21),+2-8mar[cp6]*                                                                                           | MYC+<br>BCL2+       | NEG             | 0.60          |
| 19 | 74<br>M     | BCLU  | 46,XY,t(14;18)(q32;q21)[8]/46,idem, <u>t(8;14)(q24;q32)t(14;18)(q32;q21)</u> [5]                                                                                                                              | MYC+<br>BCL2+       | POS             | 0.58          |
| 20 | 55<br>F     | BCLU  | Nuc ish(MYCx3)(IGHx3)(MYC con IGHx2),(IGHx3)(BCL2x3)(IGH con BCL2x2)[174/200] - <u>t(8;14)(q24;q32)</u> ,t(14;18)(q32;q21)                                                                                    | MYC+<br>BCL2+       | POS             | 0.56          |
| 21 | 59<br>M     | BCLU  | 46,XY,der(7)?inv(7)(q22q36)t(7;17)(q22;q11), <u>der(8)t(8;14)(q24;q32)t(14;18)(q32;q21)</u> ,del(11)(q22q23),der(14)t(14;18)(q32;q21)/47-48,idem,+ <u>der(8)t(8;14)t(14;18)</u> ,+12,+13[cp13]*               | MYC+<br>BCL2+       | POS             | 0.54          |
| 22 | 81<br>M     | BCLU  | 46,X,-Y,t(1;22)(q21;q11.2),dup(6)(?p21p23), <u>t(8;9)(q24;p13)</u> ,del(10)(q24),t(14;18)(q32;q21),+18[10]*                                                                                                   | MYC+<br>BCL2+       | NA              | 0.53          |
| 23 | 75<br>M     | DLBCL | Nuc ish(MYCx2)( 5' MYC sep 3' MYC x2),(IGHx2 )( 5'IGH sep 3'IGH x1),(MYC x3)(BCL2 x3)(MYC con BCL2 x2)[180/200] - <u>t(8;14;18)(q24;q32;q21)</u> ,t(8;?)(q24;?)                                               | MYC+<br>BCL2+       | POS             | 0.48          |
| 24 | 24<br>F     | BCLU  | 47-49,XX,add(2)(p11),der(2)?t(2;3)(p11;q11),+add(5)(q31),+7, <u>t(8;14)(q24;q32)</u> ,+ <u>der(8)t(8;14)(q24;q32)</u> ,der(11)t(11;17)(q23;q11),dup(12)(q12q24),t(14;18)(q32;q21),-17,+mar(2-4)[cp10]         | MYC: na<br>BCL2: na | NA              | 0.45          |
| 25 | 50<br>M     | BCLU  | 50-51,XY,add(2)(p24),+3,add(6)(q25),+7, <u>t(8;22)(q24;q11)</u> ,t(14;18)(q32;q21),+3mar[cp7]                                                                                                                 | MYC+<br>BCL2+       | NA              | 0.43          |
| 26 | 68<br>M     | BCLU  | 53,X,+X,Y,+i(1)(q10),+7, <u>t(8;22)(q24;q11)</u> ,+add(12q),t(14;18)(q32;q21),+der(14)t(14;18),+17,+21,+mar[4]                                                                                                | MYC+<br>BCL2: na    | NA              | 0.42          |
| 27 | 56<br>F     | BCLU  | 46,X,-X,t(2;18)(p11;q21),3,der(3)t(3;7)(q21;q11),der(4)t(3;4)(q12;p15),add(6)(?q21),+7,+8, <u>t(8;22)(q24;q11)</u> ,t(12;15)(q24;q12),del(13)(q13q31),del(15)(q12q15)[6]/45,idem,-16[2]/47,idem,+del(7q)[cp2] | MYC: na<br>BCL2+    | NA              | 0.35          |
| 28 | 76<br>M     | BCLU  | 46,XY,?dup(1)(q23q32), <u>t(8;14)(q24;q32)</u> ,del(13)(?q12q22),t(14;18)(q32;q21)[4]                                                                                                                         | MYC+<br>BCL2: na    | NA              | 0.32          |
| 29 | 90<br>F     | BCLU  | 48,X,-X,-4,add(6)(q21),+7, <u>t(8;9)(q24;p13)</u> ,+ <u>der(8)t(8;9)</u> ,+10,+12,-14,t(18;22)(q21;q11),+mar[9]                                                                                               | MYC+<br>BCL2: na    | NA              | 0.32          |
| 30 | 52<br>M     | BCLU  | 47-48,X,+X, <u>t(2;8)(p11;q24)</u> ,add(6)(q25),del(6)(q16),-13,t(14;18)(q32;q21),del(17)(p11),+21,+1-2mar[cp20]                                                                                              | MYC+<br>BCL2+       | NA              | 0.31          |
| 31 | 68<br>F     | BCLU  | 46,XX, <u>t(8;9)(q24;p13)</u> ,t(14;18)(q32;q21)[3]*                                                                                                                                                          | MYC+<br>BCL2+       | POS             | 0.30          |

| ID | Age/<br>Sex | DIAG  | Karyotype                                                                                                                                                                                                                                                                                                                                                                                            | FISH                | BCL2<br>protein | OS<br>(years) |
|----|-------------|-------|------------------------------------------------------------------------------------------------------------------------------------------------------------------------------------------------------------------------------------------------------------------------------------------------------------------------------------------------------------------------------------------------------|---------------------|-----------------|---------------|
| 32 | 52<br>F     | DLBCL | 46,XX,der(1)t(1;8)(p34;q22),del(5)(q31q34),t(6;12)(q16;q24.1),der(9)t(9;12)(p21;q13),del(10)(q22q24),der(14)t(14;18)(q32;q21),add(15)(p11),del(15)(q11.2q15),del(16)(?q21q22)[3]/46,XX,der(1)t(1;8)(p34;q22),?add(3)(q27),t(6;12)(q16;q24.1),add(8)(q24),der(9)t(9;12)(p21;q13),del(10)(q22q24), <b>der(13)t(8;13)(q22;q31)t(8;?)(q24;?)</b> ,der(14)t(14;18),del(15)(q11.2q15),del(16)(?q21q22)[11] | MYC+<br>BCL2+       | NA              | 0.28          |
| 33 | 58<br>F     | BCLU  | 48,XX,+X,del(6)(q13),add(6)(q12), <b>t(8;22)(q24;q11)</b> ,add(11)(q22),t(14;18)(q32;q21),+mar[cp17]                                                                                                                                                                                                                                                                                                 | MYC: na<br>BCL2: na | NA              | 0.27          |
| 34 | 36<br>F     | BCLU  | 59-66,XXX,der(1)t(1;?17)(p21;q12),-3,-4, <b>t(8;22)(q24;q11)x2</b> , -9,-14,-15,t(14;18)(q32;q21)x2,-19,+22,+mar[10]                                                                                                                                                                                                                                                                                 | MYC+<br>BCL2+       | NA              | 0.27          |
| 35 | 63<br>M     | BCLU  | 46,XY, <b>t(8;9)(q24;p13)</b> ,?ins(12;?)(q13;?),t(14;18)(q32;q21)[11]/48,XY,dup(1)(?q15q21),+7, <b>t(8;9)</b> ,+ <b>der(8)t(8;9)</b> ,dup(12)(?q13q15),t(14;18)[4]*                                                                                                                                                                                                                                 | MYC+<br>BCL2: na    | POS             | 0.26          |
| 36 | 31<br>M     | BCLU  | 89-92,XXYY,add(1)(q21),-3,-4,i(6)(p10)x2, <b>t(8;14)(q24;q32)</b> , -9,t(14;18)(q32;q21)x2,del(16)(p11),add(17)(p11)x2,+2r[cp9]                                                                                                                                                                                                                                                                      | MYC: na<br>BCL2: na | NA              | 0.20          |
| 37 | 48<br>F     | BCLU  | 48,XX,del(3)(?p13p14),+8, <b>t(3;8)(q27;q24)</b> , <b>der(9)t(8;9)(q1?3;p2?2)t(3;8)(q27;q24)</b> ,+add(12)(q22),t(14;18)(q32;q21)[10]*                                                                                                                                                                                                                                                               | MYC+<br>BCL2+       | POS             | 0.20          |
| 38 | 44<br>M     | BCLU  | 47,XY,-8, <b>der(8)t(8;22)(q24;q11)</b> ,+11,-13,+14,t(14;18)(q32;q21),-15,-20,+2-3mar[1]/49-50,idem,+add(7)(q22),del(9)(p22),+21,+22[6]                                                                                                                                                                                                                                                             | MYC: na<br>BCL2: na | NA              | 0.18          |
| 39 | 63<br>M     | BCLU  | 49,XY,+7, <b>t(8;14)(q24;q32)</b> ,dup(12)(q13q21),t(13;17)(p10;q10),t(14;18)(q32;q21),+17,+18[21]                                                                                                                                                                                                                                                                                                   | MYC+<br>BCL2+       | POS             | 0.18          |
| 40 | 64<br>F     | BCLU  | 49-50,X,-X,t(3;4)(q27;p15),der(4)t(4;6)(?q31;q25)t(4;13)(p11;q22),del(6)(q?25),+7, <b>der(9)t(9;13)(p11;q14)t(8;13)(q24;q34)t(8;14)(q24;q32)t(14;18)(q32;q21)</b> ,?inv(9)(?p22q31), <b>der(13)t(8;13)t(8;14)t(14;18)</b> ,t(14;18),der(16)?dup(16)(q22q24)t(8;16)(q31;q24),?del(17)(?),+?r(17)(?),+?del(18)(?),+21,+ <b>der(22)t(18;22)(?q;p11)[cp14]*</b>                                          | MYC+<br>BCL2+       | POS             | 0.15          |
| 41 | 66<br>M     | BCLU  | 54-57,XY,+X,+Y,+1,+7, <b>t(8;22)(q24;q11)</b> ,+ <b>der(8)t(8;22)</b> ,+10,t(14;18)(q32;q21),+18,+ <b>der(18)t(14;18)x2or3</b> ,+20[cp6]*                                                                                                                                                                                                                                                            | MYC+<br>BCL2+       | POS             | 0.14          |
| 42 | 67<br>F     | BCLU  | 47,X,-X,t(1;22)(q21;q11),del(3)(p11p21)(q23q27),+7, <b>t(8;9)(q24;p13)</b> ,del(10)(q24),der(12)t(6;12)(p12;q24),+ <b>der(12)t(6;12)(p12;q24)</b> ,t(14;18)(q32;q21), <b>der(22)t(11;22)q23;q13[8]*</b>                                                                                                                                                                                              | MYC+<br>BCL2+       | NA              | 0.10          |
| 43 | 84<br>M     | BCLU  | 46,XY,der(1)t(1;8)(p36;q21), <b>t(2;8)(p11;q24)</b> ,?t(3;3)(q21;q27),del(4)(p14),?add(6)(q11),add(7)(p1?5),?add(9)(p11),-13,der(14)del(14)(?q13q31)t(14;18)(q32;q21),t(14;18)(q32;q21),+ <b>der(18)t(14;18)(q32;q21)[5]*</b>                                                                                                                                                                        | MYC+<br>BCL2+       | POS             | 0.10          |
| 44 | 71<br>F     | BCLU  | 46,XX,dic(3;17)(q24;p13),del(3)(p12), <b>der(8)t(8;14)(q24;q32)t(14;18)(q32;q21)</b> ,del(13)(q12q14), <b>der(14)t(8;14)</b> ,der(18)t(14;18)[18]                                                                                                                                                                                                                                                    | MYC+<br>BCL2+       | NA              | 0.07          |
| 45 | 93<br>F     | BCLU  | 46-48,XX,del(1)(q32q44),?inv(3)(q21q27),add(4)(p16),add(6)(q13),add(7)(q31), <b>t(8;22)(q24;q11)</b> ,del(11)(q23q25),+12,del(13)(q12q21),add(13)(p13),t(14;18)(q32;q21),+mar[cp15]                                                                                                                                                                                                                  | MYC+<br>BCL2+       | NA              | 0.06          |

| ID | Age/<br>Sex | DIAG  | Karyotype                                                                                                                                                                                                                                                                                                                                                                                    | FISH                | BCL2<br>protein | OS<br>(years) |
|----|-------------|-------|----------------------------------------------------------------------------------------------------------------------------------------------------------------------------------------------------------------------------------------------------------------------------------------------------------------------------------------------------------------------------------------------|---------------------|-----------------|---------------|
| 46 | 46<br>M     | BCLU  | 46,XY,del(1)(p34),t(2;22)(p21;q11),der(6)t(6;13)q21;q14,+7,del(8)(q13), <u>t(8;9)(q24;p13)</u> ,<br>der(14)t(14;18)(q32;q21)t(8;18)(q23;q13), der(18)t(14;18)[12]*                                                                                                                                                                                                                           | MYC+<br>BCL2+       | NA              | 0.06          |
| 47 | 61<br>M     | BCLU  | 47,XY, <u>t(8;22)(q24;q11)</u> ,+der(8)t(8;22),t(14;18)(q32;q21),add(17)(q25)[10]                                                                                                                                                                                                                                                                                                            | MYC: na<br>BCL2: na | NA              | 0.06          |
| 48 | 65<br>M     | BCLU  | 45-47,XY,+der(1)t(1;?13)(p11;?q11),add(6)(q23), <u>t(8;22)(q24;q11)</u> ,add(10)(q25),-13,<br>t(14;18)(q32;q21),-15,+2mar[cp13]                                                                                                                                                                                                                                                              | MYC+<br>BCL2+       | NA              | 0.05          |
| 49 | 65<br>M     | BCLU  | 52-53,X,der(Y)t(Y;2)(?;?)t(2;8)(?;?),+i(1)(q10), <u>der(1)t(1;8)(p34;q24)</u> ,der(2)t(2;17)(?p12;?q21),<br>der(2)t(2;8)(?;?)t(8;16)(?;?), der(3)t(3;2)(?;?)t(2;6)(?;?)t(6;3)(?;?),-6,+7,<br>der(8)t(8;9)(?;?)t(9;16)(?;?),+der(8)t(8;9)t(9;16), <u>t(8;22)(q24;q11)</u> ,del(9)(p21), der(9)t(6;9)(p13;?),<br>+11,t(14;18)(q32;q21),der(16)t(6;16)(?;?)p13,+der(17)t(8;17)(?;?),+18,+21[5]* | MYC+<br>BCL2+       | NA              | 0.05          |
| 50 | 70<br>M     | BCLU  | 48-49,X,+X,-Y,del(6)(q13),+7, <u>der(8)t(8;14)(q24;q32)t(14;18)(q32;q21)</u> ,add(11)(q24),<br>der(14)t(1;14)(q12;p11), <u>der(14)t(8;14)</u> , <u>der(18)t(14;18)</u> ,+der(18)t(14;18)[8]*                                                                                                                                                                                                 | MYC+<br>BCL2: na    | POS             | 0.04          |
| 51 | 55<br>M     | BCLU  | 49,XY,+X, <u>t(2;8)(p11;q24)</u> ,t(3;22)(q27;q11),t(11;11)(p15;q14),ider(14)t(14;18)(q32;q21),<br>del(14)(q11q13),der(18)t(14;18)(q32;q21),+der(18)t(14;18)(q32;q21),+21[15]/98,idemx2[2]                                                                                                                                                                                                   | MYC+<br>BCL2+       | NA              | 0.03          |
| 52 | 64<br>F     | DLBCL | 50,XX,+8, <u>t(8;9)(q24.1;p13)</u> ,+12,der(13)t(13;13)(q3?6;q12),t(14;18)(q32;q21),<br><u>+der(18)t(8;18)(q2?2;q21)t(8;9)(q24;p13)</u> ,+20[8]/50,idem,der(X)t(X;12)(p2?1;?) [3]*                                                                                                                                                                                                           | MYC+<br>BCL2+       | POS             | 0.02          |
| 53 | 74<br>M     | DLBCL | 47,XY,+der(X)t(X;1)(p22;q25), <u>t(4;8)(p1?5;q24)</u> ,der(12)dup(12)(q13q21)t(12;15)(q24;q25),<br>t(14;18)(q32;q21),der(15)t(12;15)(q24;q25), del(17)(p13)[10]**                                                                                                                                                                                                                            | MYC+<br>BCL2+       | POS             | 0.02          |
| 54 | 82<br>M     | BCLU  | 46,XY,dup(1)(q11q25), <u>t(8;9)(q24;p13)</u> ,trp(12)(q13q22),t(14;18)(q32;q21),add(15)(p11.2),<br>add(17)(q25)[25]                                                                                                                                                                                                                                                                          | MYC+<br>BCL2+       | POS             | 0.02          |

\*Multicolor metaphase fluorescence *in situ* hybridization (M-FISH) was performed on these samples.

\*\* Type III MYC rearrangement confirmed with BACS: RP11-495D4, RP11-781C3, RP11-440N18, RP11-125A17

Abbreviations: ID, patient identification number; F, female; M, male; DIAG, diagnosis; DLBCL, diffuse large B cell lymphoma; BCLU, B cell lymphoma, unclassifiable; FISH, fluorescence in-situ hybridization; OS, overall survival; na, not available; POS, positive; NEG, negative
