# Supplementary material
Source: PubMed Central journal article supplement (PMC2745846)
Supplement: blood-2009-03-212191_2.pdf [file blood-2009-03-212191_2.pdf]

| <b>Gene</b> | <b>Breakpoint</b> | <b>Centromeric BAC</b>                                             | <b>GAP</b> | <b>Telomeric BAC</b>                                     |
|-------------|-------------------|--------------------------------------------------------------------|------------|----------------------------------------------------------|
| <b>MYC</b>  | 8q24.1            | RP11-440N18<br>RP11-367L7                                          |            | RP11-125A17<br>RP11-748F3                                |
|             |                   | RP11-495D4*<br>RP11-781C3*                                         |            | RP11-440N18*<br>RP11-125A17*                             |
|             |                   | 319kb                                                              | 87kb       | 331kb                                                    |
|             |                   | 378kb*                                                             | 1.7Mb*     | 439kb*                                                   |
| <b>PAX5</b> | 9p13.1            | RP11-663O12<br>RP11-263I4<br>RP11-644E22                           |            | RP11-117L21<br>RP11-344B23                               |
|             |                   | 655kb                                                              | 347kb      | 460kb                                                    |
| <b>BCL2</b> | 18q21.3           | RP11-53O13                                                         |            | RP11-165H6                                               |
|             |                   | 160kb                                                              | 396kb      | 184kb                                                    |
| <b>IGL</b>  | 22q11.2           | RP11-22M5<br>RP11-114D2<br>RP11-359L2<br>RP11-69B15<br>RP11-761L13 |            | RP11-1087B15<br>RP11-124F9<br>RP11-76E8                  |
|             |                   | 395kb                                                              | 883kb      | 611kb                                                    |
| <b>IGK</b>  | 2p11.2            | RP11-31G9<br>RP11-97F19<br>RP11-136K15                             |            | RP11-554H10<br>RP11-645N19<br>RP11-39F20<br>RP11-1023A24 |
|             |                   | 342kb                                                              | 839kb      | 349kb                                                    |

\*far centromeric breakpoint *MYC* as per Hummel M, Bentink S, Berger H, et al. A biologic definition of Burkitt's lymphoma from transcriptional and genomic profiling. N Engl J Med. 2006;354:2419-2430 (Supplementary Appendix).
