# Supplementary material
Source: PubMed Central journal article supplement (PMC2745846)

(A)

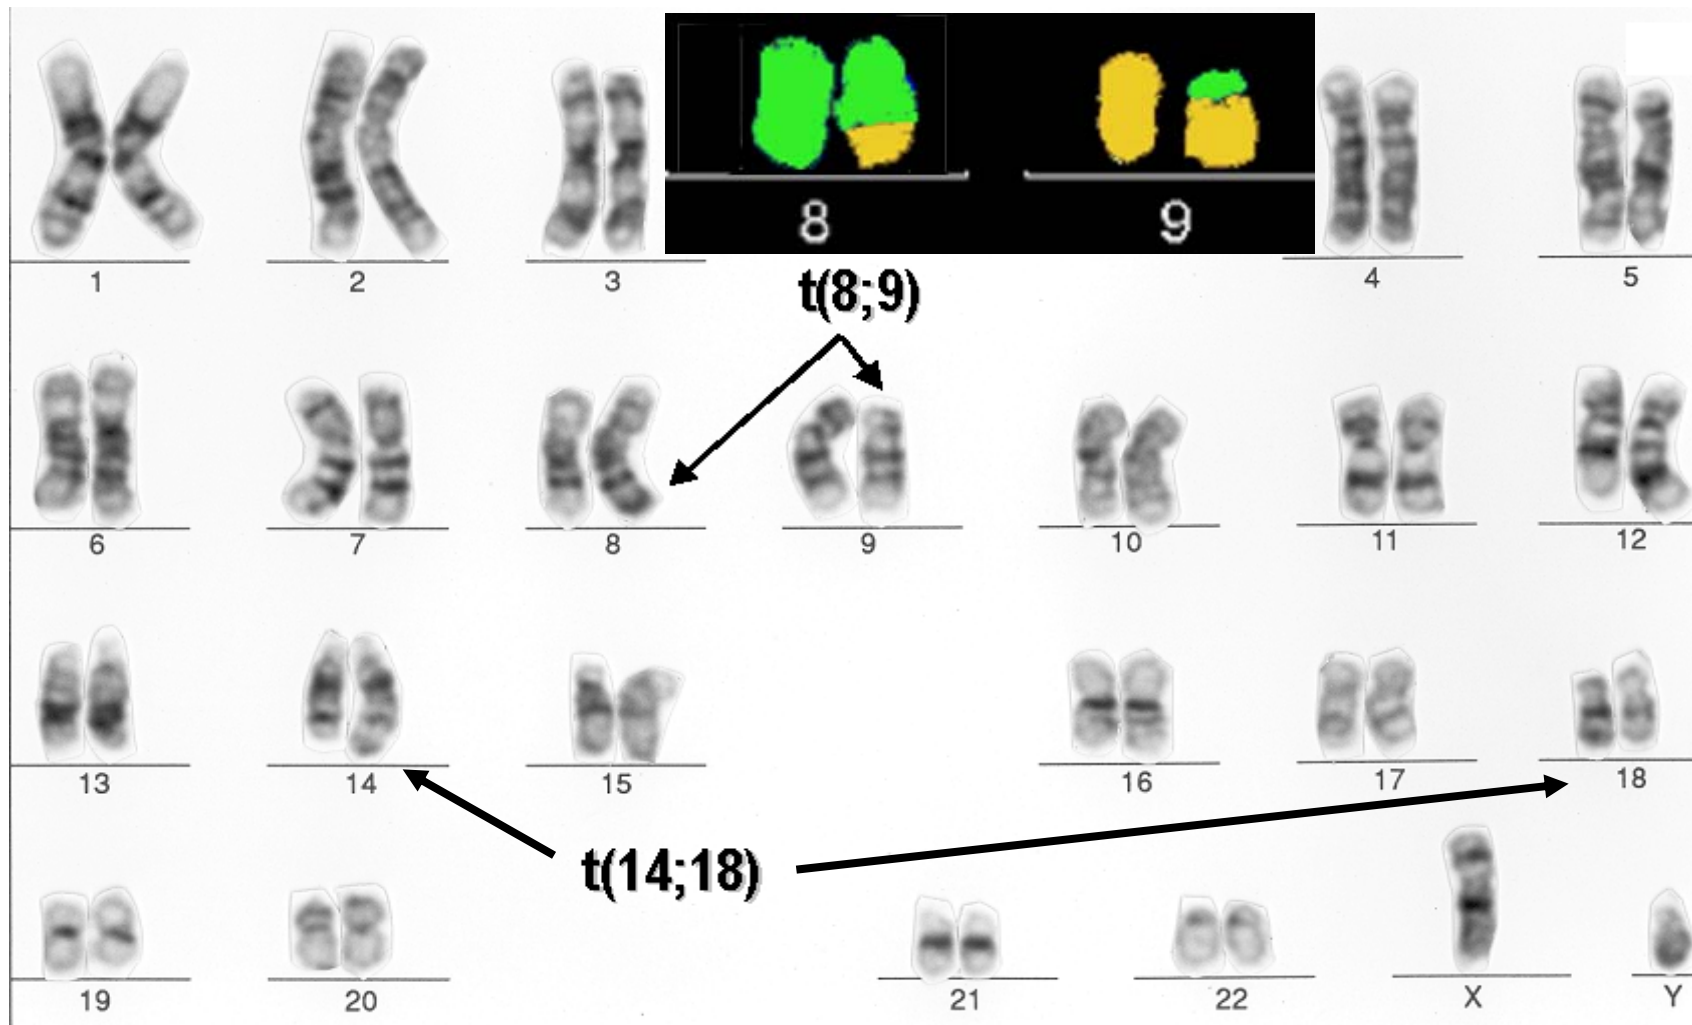

(B)

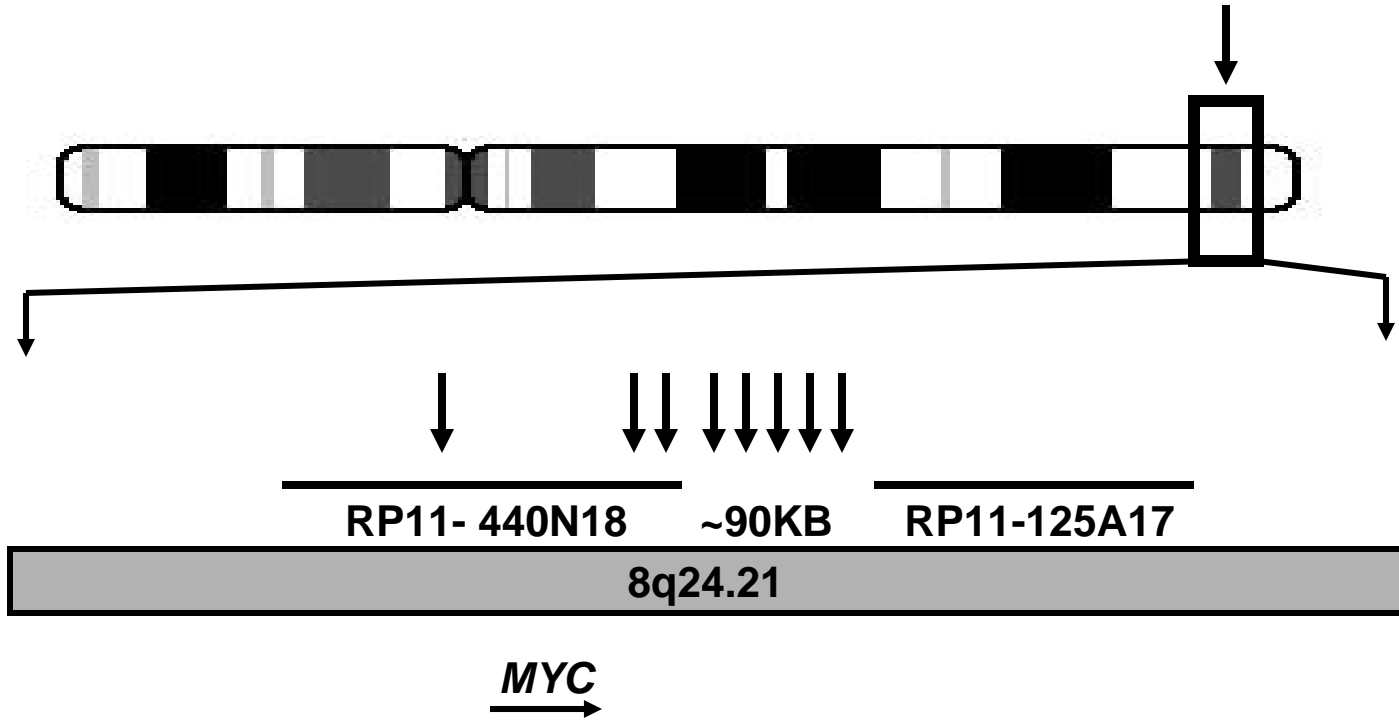

(C)

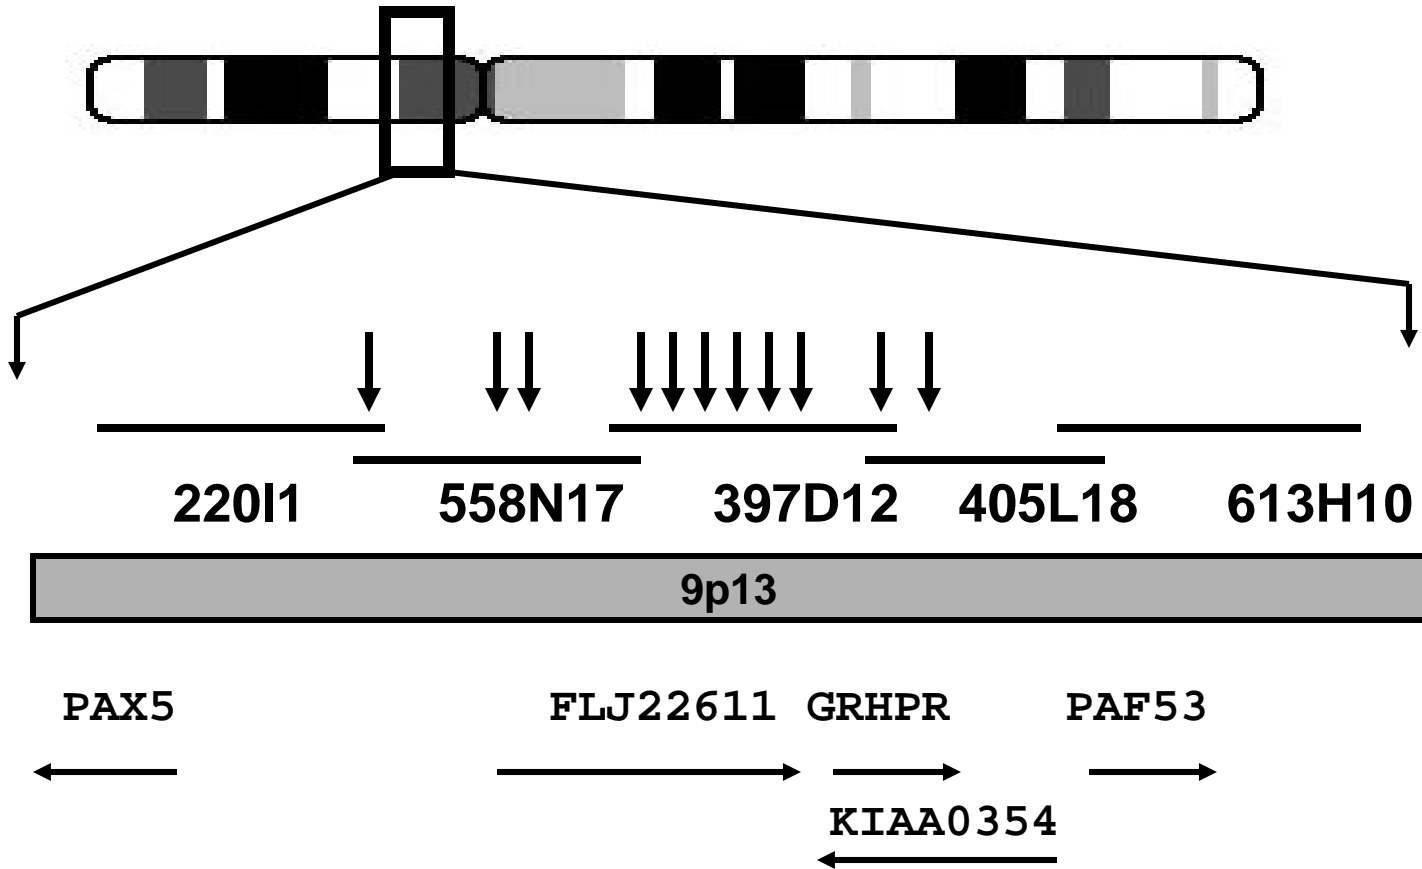

(D)

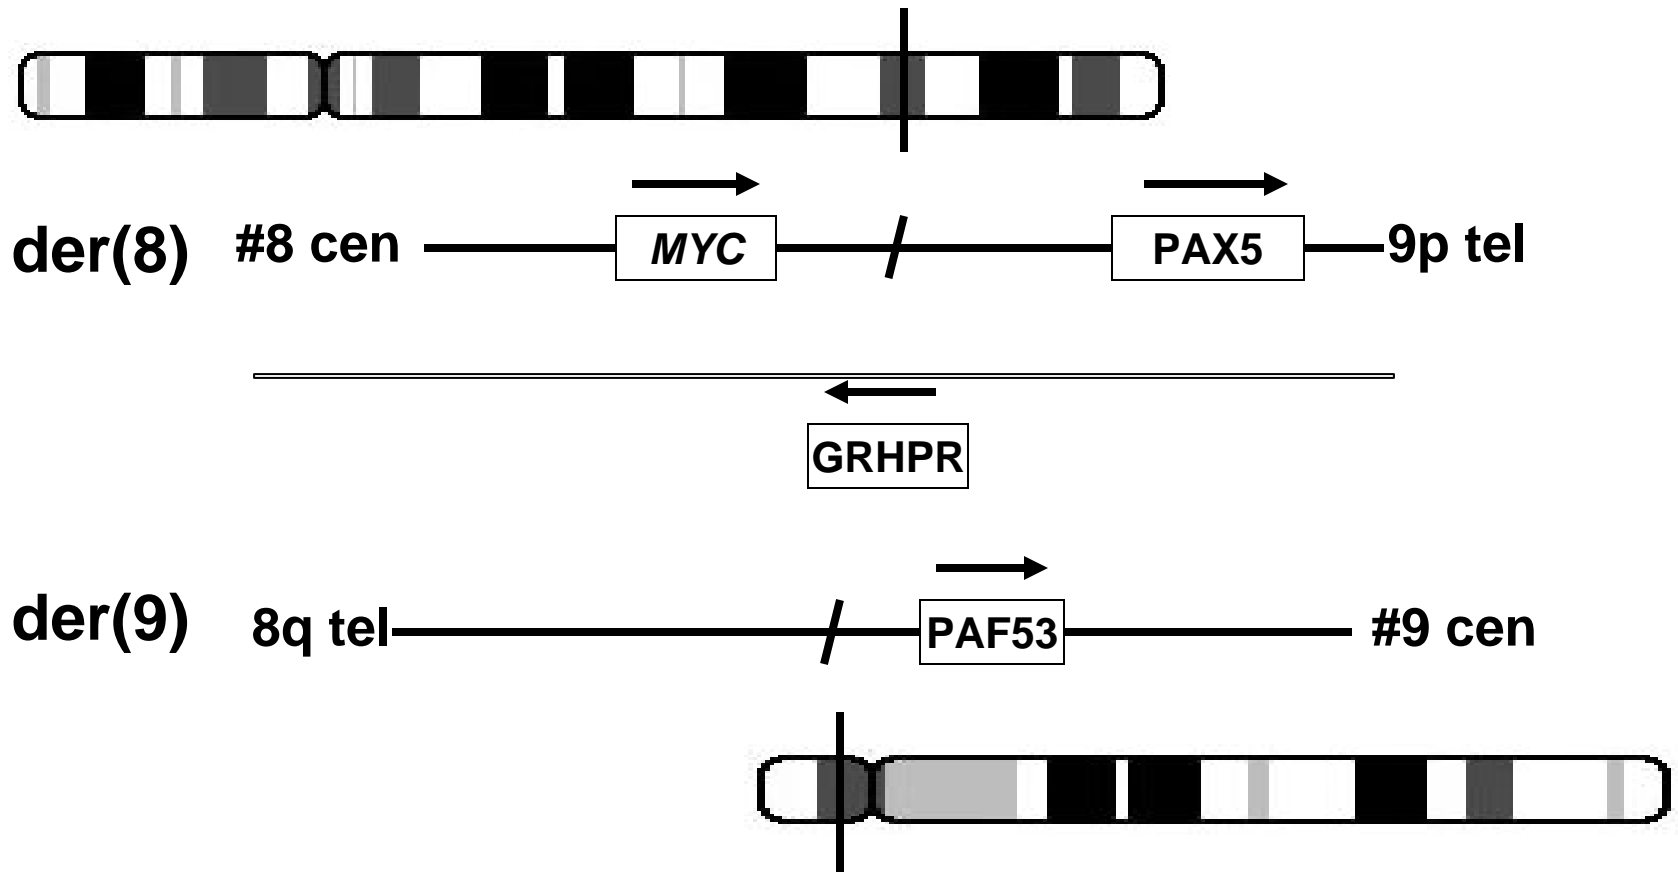

Supplement: blood-2009-03-212191_3.pdf [file blood-2009-03-212191_3.pdf]
